# Supplementary material for: Party institutionalization and intra-party preference homogeneity
Source: Springer Nature journal article supplement (doi:10.1007/s12286-019-00421-9), 2019-06-01
Supplement: 12286_2019_421_MOESM1_ESM.pdf [file 12286_2019_421_MOESM1_ESM.pdf]

## Appendix to “Party institutionalization and intra-party preference homogeneity”

|                                                                                                                                                                                                                                   |    |
|-----------------------------------------------------------------------------------------------------------------------------------------------------------------------------------------------------------------------------------|----|
| Table A1. Items measuring attitudes towards economic, sociocultural issues, European integration, and protection of the environment .....                                                                                         | 2  |
| Table A2. Regression table for Figure 3 .....                                                                                                                                                                                     | 3  |
| Table A3. Regression table for Figure 4 .....                                                                                                                                                                                     | 4  |
| Figure A1. Version of Figure 4 with interactions for routinization in one model.....                                                                                                                                              | 5  |
| Figure A2. Version of Figure 4 with interactions for value infusion in one model .....                                                                                                                                            | 5  |
| Table A4. Determinants of intra-party preference homogeneity – Baseline models estimated as multilevel random effect models .....                                                                                                 | 6  |
| Figure A3: Constitutive issues, party institutionalization, and preference homogeneity – Version of figure 3 based on multilevel random effect models .....                                                                       | 7  |
| Figure A4: Effects of party institutionalization on preference homogeneity, conditional on policy orientation and centralization – Version of figure 3 based on multilevel random effect models.....                              | 8  |
| Table A5. Determinants of intra-party preference homogeneity – Pooled baseline model with controls for party family included as fixed effect and random effect version.....                                                       | 9  |
| Table A6. Determinants of intra-party preference homogeneity – Baseline model with only one (the last) election per country .....                                                                                                 | 11 |
| Figure A5. Version of Figure 3 with only one (the last) election per country .....                                                                                                                                                | 12 |
| Figure A6. Version of Figure 4 with only one (the last) election per country .....                                                                                                                                                | 13 |
| Figure A7. Version of Figure 2 excluding candidates who thought they could not win from the computation of homogeneity and value infusion – Joint distribution of routinization, value infusion and intra-party homogeneity ..... | 14 |
| Table A7. Determinants of intra-party preference homogeneity – Baseline model excluding candidates who thought they could not win from the computation of homogeneity and value infusion.....                                     | 15 |
| Figure A8. Version of Figure 3 excluding candidates who thought they could not win from the computation of homogeneity and value infusion .....                                                                                   | 16 |
| Figure A9. Version of Figure 4 excluding candidates who thought they could not win from the computation of homogeneity and value infusion .....                                                                                   | 17 |
| Table A8. Raw party level data (main variables only).....                                                                                                                                                                         | 18 |

**Table A1. Items measuring attitudes towards economic, sociocultural issues, European integration, and protection of the environment**

| <i>Items</i>                                                                                                                                           | <i>Response options/scales</i>                                                       |
|--------------------------------------------------------------------------------------------------------------------------------------------------------|--------------------------------------------------------------------------------------|
| <i>Economic issues</i>                                                                                                                                 |                                                                                      |
| “Providing a stable network of social security should be the prime goal of government.”                                                                | 0: left; 1: right<br>1: strongly agree; 5: strongly disagree                         |
| “Income and wealth should be redistributed towards ordinary people.”                                                                                   | 1: strongly agree; 5: strongly disagree                                              |
| “Politics should abstain from intervening in the economy.”                                                                                             | 1: strongly disagree; 5: strongly agree                                              |
| <i>Socio-cultural issues</i>                                                                                                                           |                                                                                      |
| “Immigrants should be required to adjust to the customs of [country].”                                                                                 | 0: libertarian; 1: authoritarian<br>1: strongly disagree; 5: strongly agree          |
| “People who break the law should be given stiffer sentences.”                                                                                          | 1: strongly disagree; 5: strongly agree                                              |
| “Torturing a prisoner is never justified even if it might prevent a terrorist attack.”                                                                 | 1: strongly agree; 5: strongly disagree                                              |
| “Same sex marriages should be prohibited by law.”                                                                                                      | 1: strongly disagree; 5: strongly agree                                              |
| “Women should be free to decide on matters of abortion.”                                                                                               | 1: strongly agree; 5: strongly disagree                                              |
| <i>European integration</i>                                                                                                                            |                                                                                      |
| “Generally speaking, do you think that [country’s] membership of the European Union is a good thing, a bad thing, or neither good nor bad?”            | 0: anti EU; 1: pro EU<br>0: a bad thing; 1: neither good nor bad;<br>2: a good thing |
| “Some say European unification should be pushed further. Others say it already has gone too far. What is your opinion?”                                | 0: has already gone too far; 10: should be pushed further                            |
| “All in all, are you very satisfied, fairly satisfied, not very satisfied or not at all satisfied with the way democracy works in the European Union?” | 0: not at all satisfied; 3: very satisfied                                           |
| <i>Environmental protection</i>                                                                                                                        |                                                                                      |
| “Stronger measures should be taken to protect the environment.”                                                                                        | 1: pro; 5: anti<br>1: strongly agree; 5: strongly disagree                           |
| <i>Social justice issues</i>                                                                                                                           |                                                                                      |
| “Providing a stable network of social security should be the prime goal of government.”                                                                | 0: left; 1: right<br>1: strongly agree; 5: strongly disagree                         |
| “Income and wealth should be redistributed towards ordinary people.”                                                                                   | 1: strongly agree; 5: strongly disagree                                              |

*Note:* Positions on the economic and the socio-cultural dimension as well as on social justice issues are measured via additive indices (rescaled to range from zero to one) of the listed items; preferences on environmental protection is measured via a single item. Answers to all these items were given on a five-point Likert scale (strongly disagree, disagree, neither, agree, strongly agree) and have been coded so that higher values indicate more conservative (right wing) positions. Since the three items on European integration use different Likert scales, we recoded them to a common range (0 to 1) and computed an additive index.

**Table A2. Regression table for Figure 3**

|                             | Environment       | Environment        | Social justice    | Social justice    |
|-----------------------------|-------------------|--------------------|-------------------|-------------------|
| Party routinization         | 0.06<br>(0.12)    |                    | 0.02<br>(0.11)    |                   |
| Green parties               | 0.29<br>(0.17)    | 0.39***<br>(0.09)  |                   |                   |
| Green * Party routinization | -0.00<br>(0.27)   |                    |                   |                   |
| Value infusion              |                   | 0.19<br>(0.10)     |                   | 0.07<br>(0.10)    |
| Green * Value infusion      |                   | -0.24<br>(0.18)    |                   |                   |
| Left parties                |                   |                    | 0.07<br>(0.08)    | 0.30***<br>(0.07) |
| Left * Party routinization  |                   |                    | 0.06<br>(0.12)    |                   |
| Left * Value infusion       |                   |                    |                   | -0.30*<br>(0.13)  |
| Party size                  | -0.25<br>(0.14)   | -0.35***<br>(0.10) | -0.18<br>(0.12)   | -0.10<br>(0.10)   |
| Party age (log)             | -0.01<br>(0.02)   | 0.01<br>(0.01)     | -0.01<br>(0.01)   | -0.01<br>(0.01)   |
| Constant                    | 0.65***<br>(0.07) | 0.58***<br>(0.06)  | 0.60***<br>(0.06) | 0.53***<br>(0.05) |
| <i>N parties</i>            | 119               | 141                | 116               | 133               |
| <i>N elections</i>          | 24                | 23                 | 22                | 21                |

Notes: Coefficient from OLS-regressions with fixed effects at the election level; standard errors in parentheses; \*  $p < 0.05$ , \*\*  $p < 0.01$ , \*\*\*  $p < 0.001$ .

**Table A3. Regression table for Figure 4**

|                                                       | Pooled issues     | Pooled issues     | Pooled issues     | Pooled issues     |
|-------------------------------------------------------|-------------------|-------------------|-------------------|-------------------|
| Party routinization                                   | 1.25**<br>(0.43)  |                   | 0.25<br>(0.13)    |                   |
| Policy orientation                                    | 1.18***<br>(0.34) | 0.25<br>(0.26)    | 0.29**<br>(0.11)  | 0.25*<br>(0.10)   |
| Party routinization * policy orientation              | -1.28**<br>(0.48) |                   |                   |                   |
| Candidate selection                                   | 0.12<br>(0.07)    | 0.20**<br>(0.07)  | 0.35*<br>(0.17)   | 0.38*<br>(0.16)   |
| Value infusion                                        |                   | 0.23<br>(0.43)    |                   | 0.35**<br>(0.13)  |
| Value infusion * policy orientation                   |                   | -0.01<br>(0.49)   |                   |                   |
| Party routinization * candidate selection             |                   |                   | -0.38<br>(0.29)   |                   |
| Value infusion * candidate selection                  |                   |                   |                   | -0.33<br>(0.26)   |
| Party size                                            | 0.00<br>(0.10)    | 0.00<br>(0.09)    | 0.08<br>(0.11)    | 0.01<br>(0.09)    |
| Party age (log)                                       | -0.01<br>(0.01)   | -0.00<br>(0.01)   | -0.01<br>(0.01)   | -0.01<br>(0.01)   |
| <i>Issue (reference category: economic dimension)</i> |                   |                   |                   |                   |
| Sociocultural dim.                                    | 0.05**<br>(0.02)  | 0.05**<br>(0.02)  | 0.05**<br>(0.02)  | 0.05**<br>(0.02)  |
| European integration                                  | -0.06**<br>(0.02) | -0.06**<br>(0.02) | -0.06**<br>(0.02) | -0.06**<br>(0.02) |
| Constant                                              | -0.57<br>(0.30)   | 0.19<br>(0.23)    | 0.13<br>(0.12)    | 0.12<br>(0.12)    |
| <i>N parties</i>                                      | 308               | 295               | 308               | 295               |
| <i>N elections</i>                                    | 22                | 20                | 22                | 20                |

Notes: Coefficient from OLS-regressions with fixed effects at the election level; standard errors in parentheses; \*  $p < 0.05$ , \*\*  $p < 0.01$ , \*\*\*  $p < 0.001$ .

**Figure A1. Version of Figure 4 with interactions for routinization in one model**

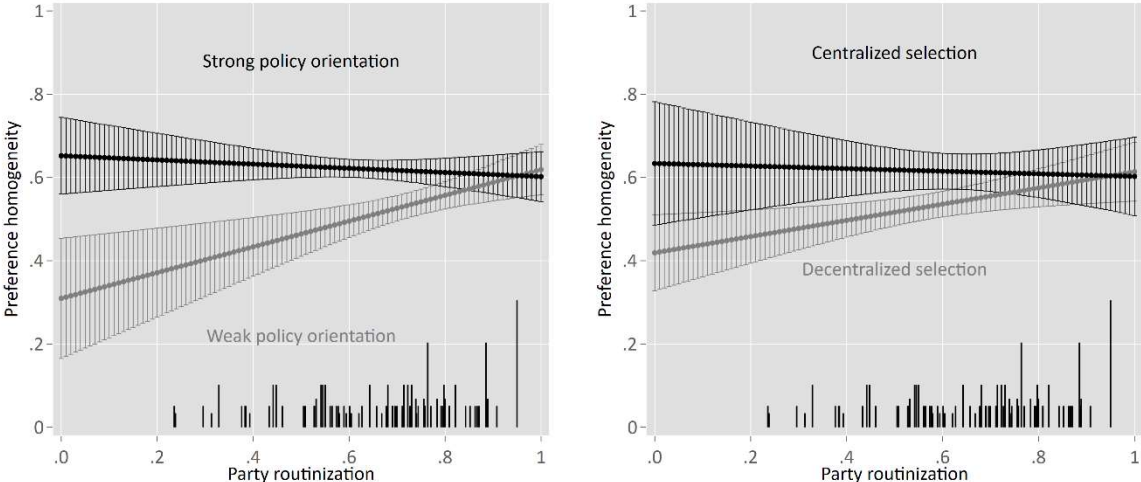

*Notes:* Predicted values for preference homogeneity with 83% confidence intervals. Non-overlapping 83% confidence intervals indicate that the predicted values are different with approximately  $p < 0.05$ . Histogram with observed variables for measures of institutionalization added. Prediction made for 5<sup>th</sup> and 95<sup>th</sup> percentile of the moderator variable.

**Figure A2. Version of Figure 4 with interactions for value infusion in one model**

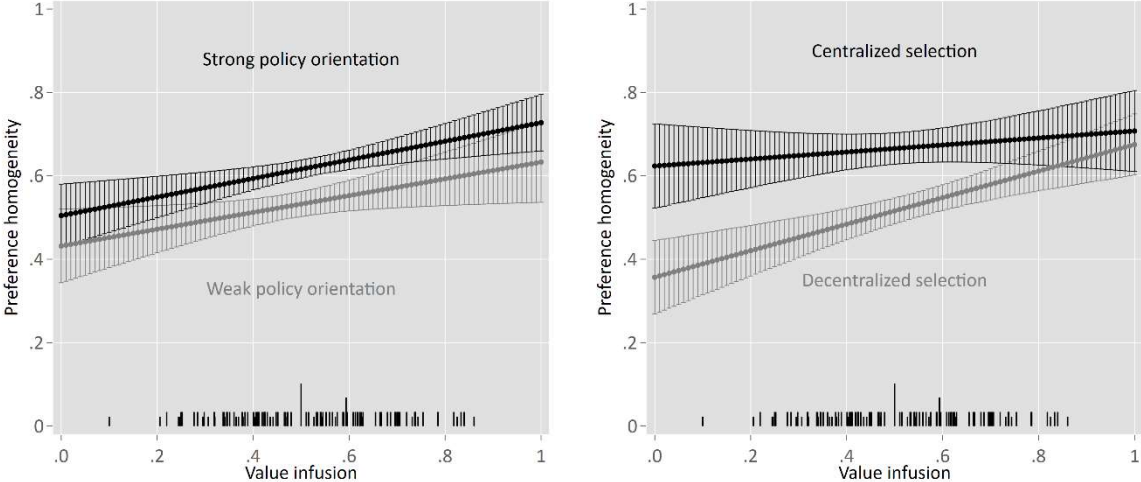

*Notes:* Predicted values for preference homogeneity with 83% confidence intervals. Non-overlapping 83% confidence intervals indicate that the predicted values are different with approximately  $p < 0.05$ . Histogram with observed variables for measures of institutionalization added. Prediction made for 5<sup>th</sup> and 95<sup>th</sup> percentile of the moderator variable.

**Table A4. Determinants of intra-party preference homogeneity – Baseline models estimated as multilevel random effect models**

|                                                       | Economic dimension | Sociocultural dimension | EU integration  | Pooled issues     |
|-------------------------------------------------------|--------------------|-------------------------|-----------------|-------------------|
| Party routinization                                   | 0.11<br>(0.10)     | 0.13<br>(0.09)          | 0.14<br>(0.14)  | 0.12<br>(0.07)    |
| Value infusion                                        | 0.18*<br>(0.09)    | 0.11<br>(0.08)          | 0.28*<br>(0.13) | 0.18**<br>(0.06)  |
| Policy orientation                                    | 0.29*<br>(0.14)    | 0.24<br>(0.13)          | -0.04<br>(0.19) | 0.17<br>(0.10)    |
| Centralized selection                                 | 0.12<br>(0.08)     | 0.00<br>(0.07)          | 0.07<br>(0.11)  | 0.09<br>(0.05)    |
| Party size                                            | -0.11<br>(0.13)    | -0.14<br>(0.12)         | 0.21<br>(0.22)  | -0.04<br>(0.09)   |
| Party age (log)                                       | -0.01<br>(0.01)    | -0.02<br>(0.01)         | -0.03<br>(0.02) | -0.02<br>(0.01)   |
| <i>Issue (reference category: economic dimension)</i> |                    |                         |                 |                   |
| Sociocultural dim.                                    |                    |                         |                 | 0.05**<br>(0.02)  |
| European integration                                  |                    |                         |                 | -0.05**<br>(0.02) |
| Constant                                              | 0.16<br>(0.15)     | 0.37**<br>(0.13)        | 0.35<br>(0.20)  | 0.29**<br>(0.10)  |
| <b>Random effect standard deviations</b>              |                    |                         |                 |                   |
| Intercept (election level)                            | 2.43e-10           | 0.03                    | 5.45e-13        | 6.52e-11          |
| Intercept (country level)                             | 0.08               | 0.05                    | 0.06            | 0.05              |
| <b>Residual intraclass correlation (ICC)</b>          |                    |                         |                 |                   |
| Election level                                        | 0.39               | 0.17                    | 0.13            | 0.16              |
| Country level                                         | 0.39               | 0.26                    | 0.13            | 0.16              |
| <b>Observations</b>                                   |                    |                         |                 |                   |
| N parties                                             | 102                | 107                     | 86              | 295               |
| N elections                                           | 19                 | 20                      | 16              | 20                |
| N countries                                           | 14                 | 15                      | 12              | 15                |

*Notes:* Coefficient from multilevel model with three levels (level 1: parties, level 2: elections, level 3: countries) and random intercepts at the election and country level; fit by restricted maximum likelihood; standard errors in parentheses; \*  $p < 0.05$ , \*\*  $p < 0.01$ , \*\*\*  $p < 0.001$ .

**Figure A3: Constitutive issues, party institutionalization, and preference homogeneity – Version of figure 3 based on multilevel random effect models**

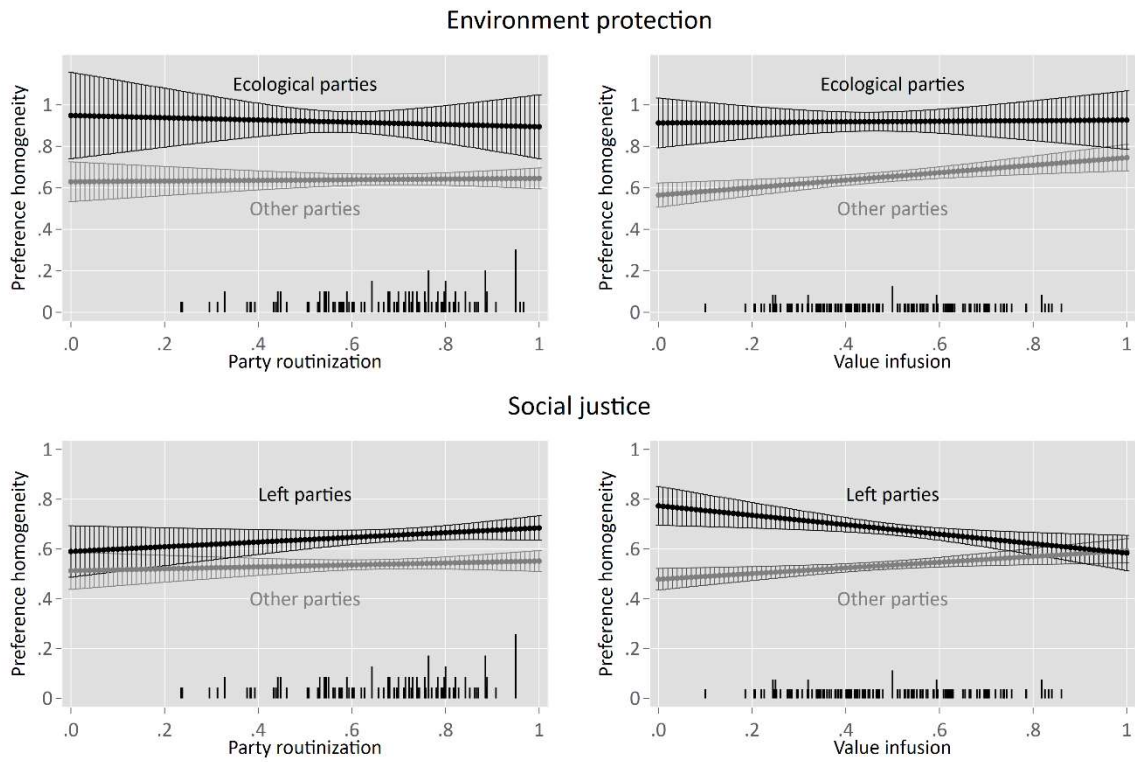

*Notes:* Predicted values for preference homogeneity with 83% confidence intervals. Non-overlapping 83% confidence intervals indicate that the predicted values are different with approximately  $p < 0.05$ . Histogram with observed variables for measures of institutionalization added.

**Figure A4: Effects of party institutionalization on preference homogeneity, conditional on policy orientation and centralization – Version of figure 3 based on multilevel random effect models**

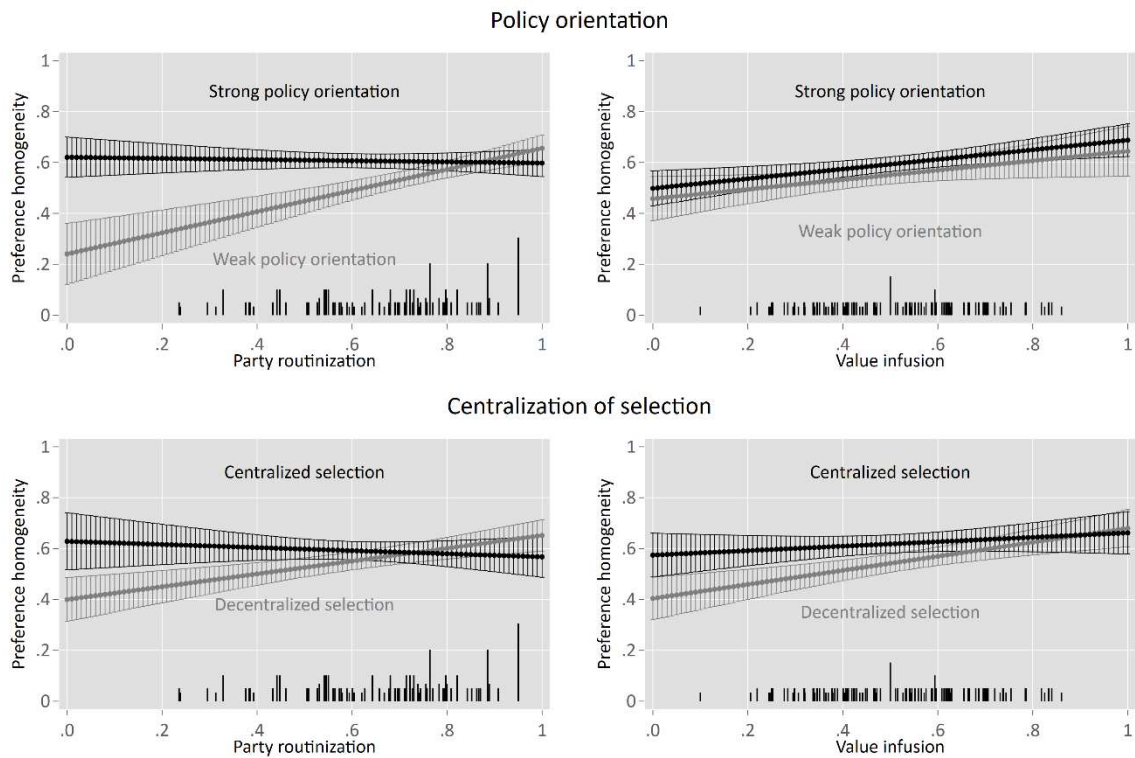

*Notes:* Predicted values for preference homogeneity with 83% confidence intervals. Non-overlapping 83% confidence intervals indicate that the predicted values are different with approximately  $p < 0.05$ . Histogram with observed variables for measures of institutionalization added. Prediction made for 5th and 95th percentile of the moderator variable.



**Table A5. Determinants of intra-party preference homogeneity – Pooled baseline model with controls for party family included as fixed effect and random effect version**

|                                                        | (1)<br>Fixed effect model   | (2)<br>Random effect model  |
|--------------------------------------------------------|-----------------------------|-----------------------------|
| Party routinization                                    | 0.19 <sup>+</sup><br>(0.10) | 0.13 <sup>+</sup><br>(0.07) |
| Value infusion                                         | 0.14<br>(0.09)              | 0.17**<br>(0.06)            |
| Policy orientation                                     | 0.15<br>(0.13)              | -0.01<br>(0.10)             |
| Centralized selection                                  | 0.10<br>(0.08)              | 0.04<br>(0.06)              |
| Party size                                             | -0.03<br>(0.13)             | 0.01<br>(0.10)              |
| Party age (log)                                        | -0.01<br>(0.01)             | -0.02<br>(0.01)             |
| <i>Party family (reference category: conservative)</i> |                             |                             |
| Ecologist                                              | 0.12**<br>(0.05)            | 0.14***<br>(0.04)           |
| Communist                                              | 0.10*<br>(0.04)             | 0.11**<br>(0.04)            |
| Social-democrat                                        | 0.09**<br>(0.03)            | 0.10**<br>(0.03)            |
| Liberal                                                | 0.07 <sup>+</sup><br>(0.04) | 0.07 <sup>+</sup><br>(0.04) |
| Christian-democrat                                     | 0.05<br>(0.04)              | 0.05<br>(0.04)              |
| Nationalist                                            | 0.11*<br>(0.06)             | 0.09 <sup>+</sup><br>(0.05) |
| Agrarian                                               | 0.04<br>(0.04)              | 0.04<br>(0.04)              |
| Ethnic-regional                                        | 0.13**<br>(0.05)            | 0.13**<br>(0.05)            |
| Special issue                                          | -0.04<br>(0.07)             | -0.06<br>(0.06)             |
| <i>Issue (reference category: economic dimension)</i>  |                             |                             |
| Sociocultural dim.                                     | 0.05**<br>(0.02)            | 0.05**<br>(0.02)            |
| European integration                                   | -0.06**<br>(0.02)           | -0.05**<br>(0.02)           |
| Constant                                               | 0.18<br>(0.14)              | 0.37***<br>(0.11)           |
| <b>Random effect standard deviations</b>               |                             |                             |
| Intercept (election level)                             |                             | 1.80e-10                    |
| Intercept (country level)                              |                             | 0.03                        |
| <b>Residual intraclass correlation (ICC)</b>           |                             |                             |
| Election level                                         |                             | 0.08                        |
| Country level                                          |                             | 0.08                        |
| <b>Observations</b>                                    |                             |                             |
| N parties                                              | 295                         | 295                         |
| N elections                                            | 20                          | 20                          |

---

*Notes:* Model 1: Coefficient from OLS-regressions with fixed effects at the election level; Model 2: Coefficient from multilevel model with three levels (level 1: parties, level 2: elections, level 3: countries) and random intercepts at the election and country level fit by restricted maximum likelihood; standard errors in parentheses; \*  $p < 0.10$ ,  $p < 0.05$ , \*\*  $p < 0.01$ , \*\*\*  $p < 0.001$ .

**Table A6. Determinants of intra-party preference homogeneity – Baseline model with only one (the last) election per country**

|                                                       | Economic dimension | Sociocultural dimension | EU integration  | Pooled issues      |
|-------------------------------------------------------|--------------------|-------------------------|-----------------|--------------------|
| Party routinization                                   | 0.19<br>(0.16)     | 0.19<br>(0.14)          | -0.04<br>(0.25) | 0.11<br>(0.10)     |
| Value infusion                                        | 0.28*<br>(0.13)    | 0.19<br>(0.12)          | 0.31<br>(0.24)  | 0.24*<br>(0.09)    |
| Policy orientation                                    | 0.40<br>(0.21)     | 0.49**<br>(0.17)        | -0.06<br>(0.30) | 0.26*<br>(0.13)    |
| Centralized selection                                 | 0.23<br>(0.13)     | 0.18<br>(0.12)          | 0.16<br>(0.21)  | 0.19*<br>(0.09)    |
| Party size                                            | -0.25<br>(0.18)    | -0.29<br>(0.17)         | 0.34<br>(0.33)  | -0.10<br>(0.13)    |
| Party age (log)                                       | -0.01<br>(0.02)    | -0.02<br>(0.02)         | -0.01<br>(0.03) | -0.01<br>(0.01)    |
| <i>Issue (reference category: economic dimension)</i> |                    |                         |                 |                    |
| Sociocultural dim.                                    |                    |                         |                 | 0.03<br>(0.02)     |
| European integration                                  |                    |                         |                 | -0.08***<br>(0.02) |
| Constant                                              | -0.08<br>(0.25)    | -0.00<br>(0.19)         | 0.36<br>(0.34)  | 0.14<br>(0.15)     |
| <i>N parties</i>                                      | 78                 | 83                      | 67              | 228                |
| <i>N elections/countries</i>                          | 14                 | 15                      | 12              | 15                 |

Notes: Coefficient from OLS-regressions with fixed effects at the election level; standard errors in parentheses; \*  $p < 0.05$ , \*\*  $p < 0.01$ , \*\*\*  $p < 0.001$ .

**Figure A5. Version of Figure 3 with only one (the last) election per country**

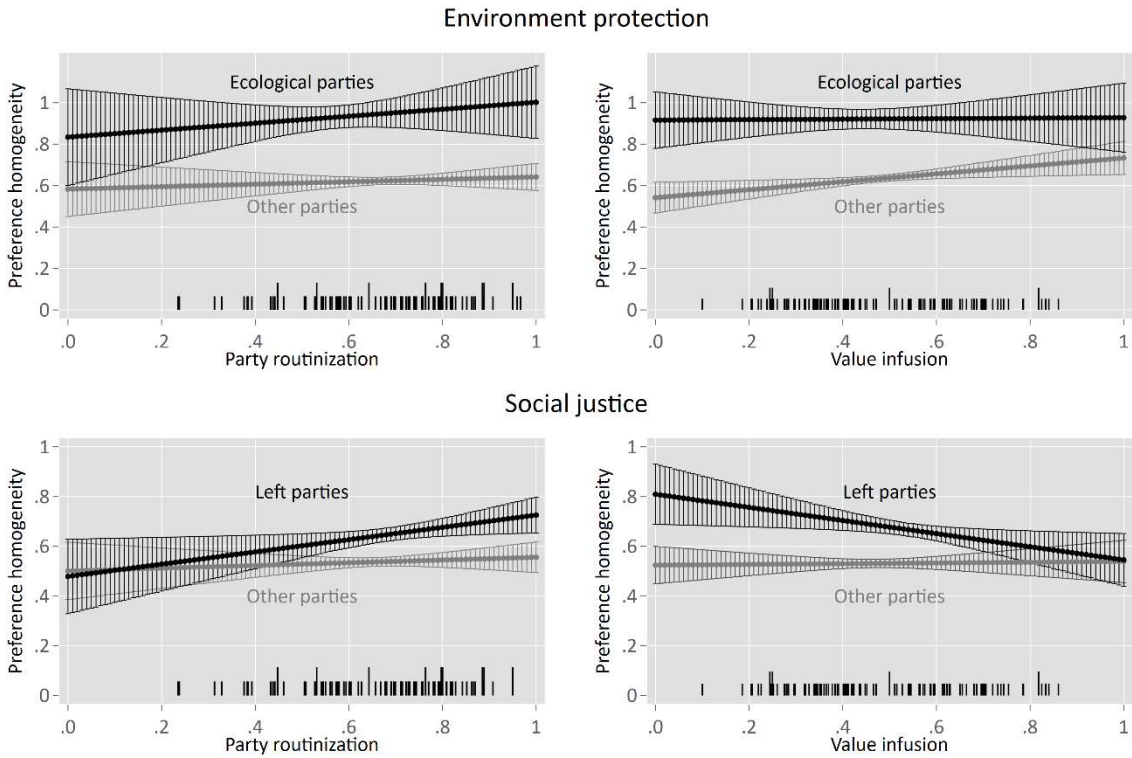

*Notes:* Predicted values for preference homogeneity with 83% confidence intervals. Non-overlapping 83% confidence intervals indicate that the predicted values are different with approximately  $p < 0.05$ . Histogram with observed variables for measures of institutionalization added.

**Figure A6. Version of Figure 4 with only one (the last) election per country**

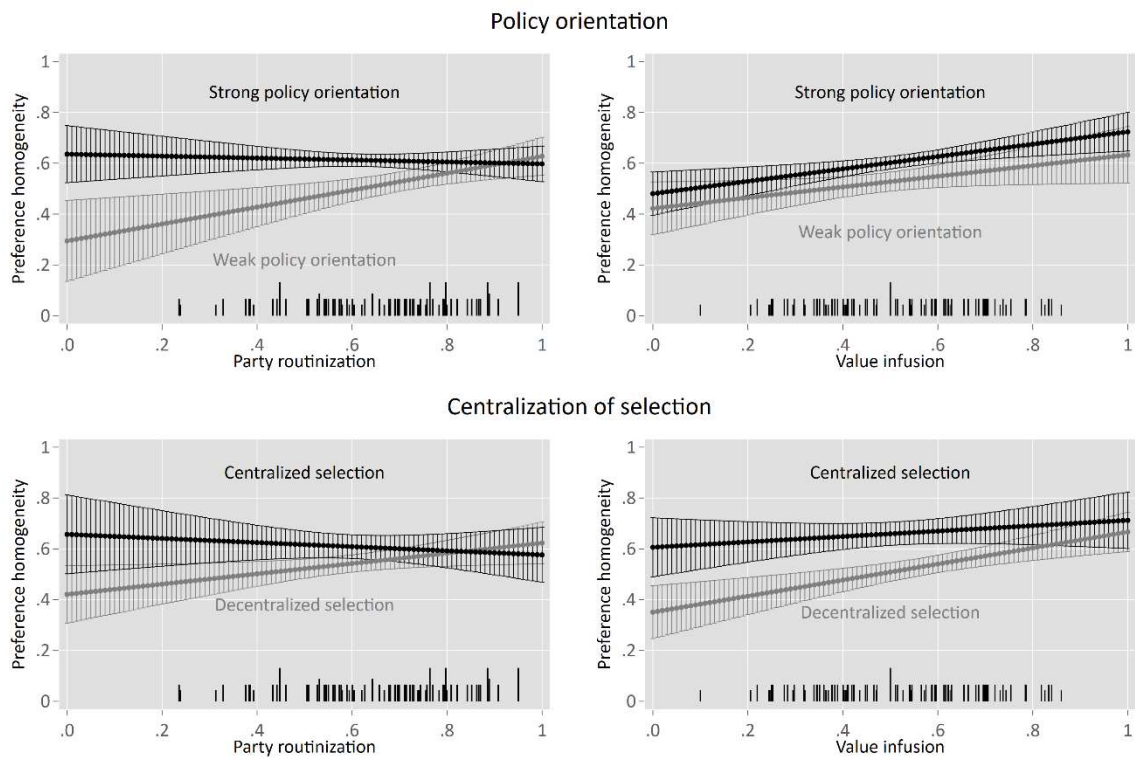

*Notes:* Predicted values for preference homogeneity with 83% confidence intervals. Non-overlapping 83% confidence intervals indicate that the predicted values are different with approximately  $p < 0.05$ . Histogram with observed variables for measures of institutionalization added. Prediction made for 5th and 95th percentile of the moderator variable.

**Figure A7. Version of Figure 2 excluding candidates who thought they could not win from the computation of homogeneity and value infusion – Joint distribution of routinization, value infusion and intra-party homogeneity**

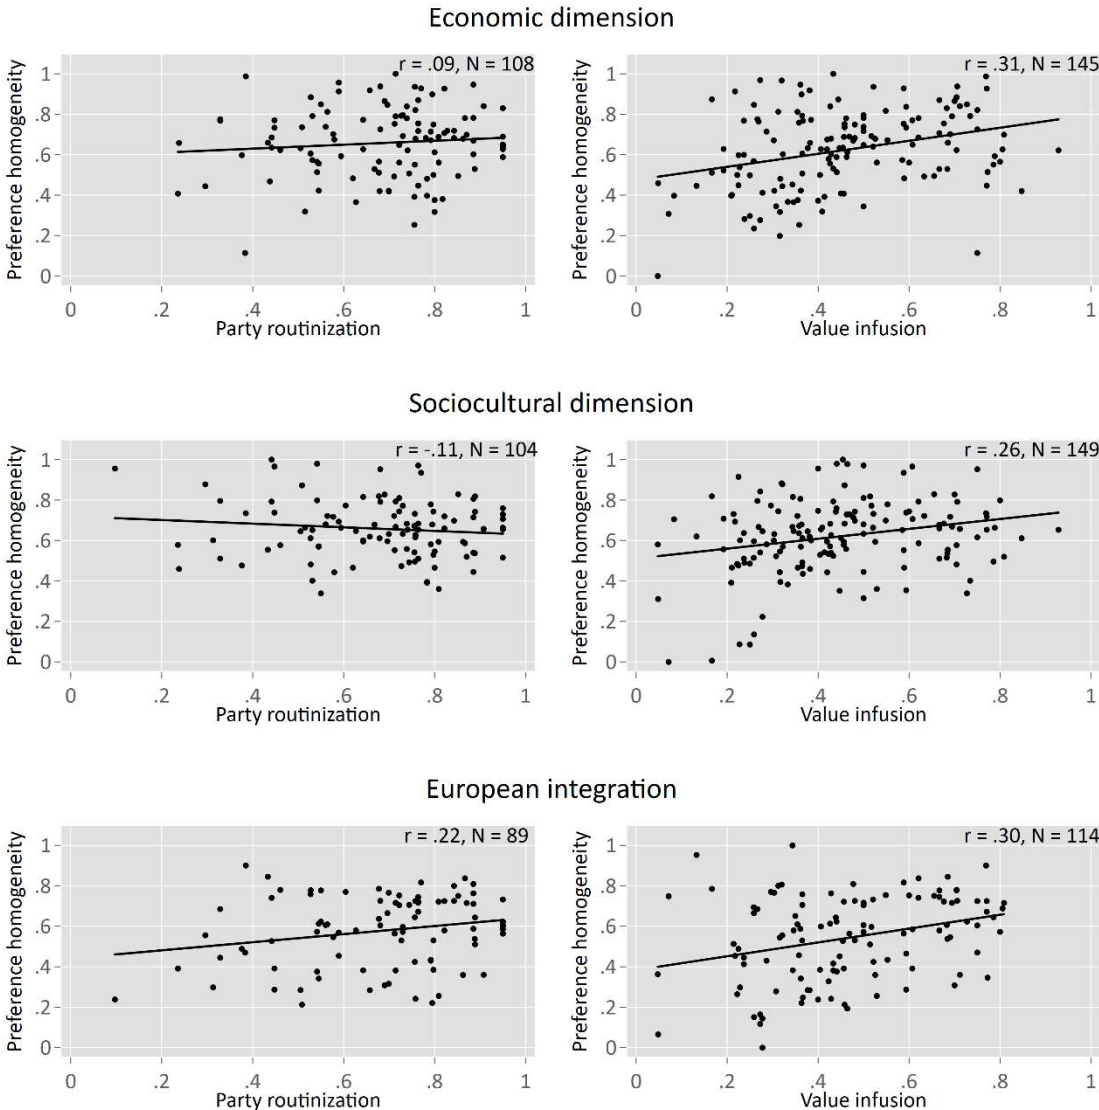

**Table A7. Determinants of intra-party preference homogeneity – Baseline model excluding candidates who thought they could not win from the computation of homogeneity and value infusion**

|                                                       | Economic dimension | Sociocultural dimension | EU integration  | Pooled issues      |
|-------------------------------------------------------|--------------------|-------------------------|-----------------|--------------------|
| Party routinization                                   | 0.07<br>(0.21)     | -0.05<br>(0.16)         | -0.00<br>(0.20) | -0.00<br>(0.11)    |
| Value infusion                                        | 0.12<br>(0.16)     | -0.12<br>(0.14)         | 0.41*<br>(0.19) | 0.11<br>(0.10)     |
| Policy orientation                                    | 0.72*<br>(0.28)    | 0.38<br>(0.21)          | -0.06<br>(0.27) | 0.31*<br>(0.15)    |
| Centralized selection                                 | 0.60***<br>(0.17)  | 0.12<br>(0.14)          | 0.13<br>(0.17)  | 0.29**<br>(0.09)   |
| Party size                                            | -0.05<br>(0.25)    | 0.14<br>(0.21)          | 0.20<br>(0.29)  | 0.08<br>(0.15)     |
| Party age (log)                                       | -0.01<br>(0.03)    | 0.02<br>(0.02)          | -0.02<br>(0.03) | -0.00<br>(0.01)    |
| <i>Issue (reference category: economic dimension)</i> |                    |                         |                 |                    |
| Sociocultural dim.                                    |                    |                         |                 | -0.01<br>(0.02)    |
| European integration                                  |                    |                         |                 | -0.11***<br>(0.02) |
| Constant                                              | -0.30<br>(0.30)    | 0.29<br>(0.22)          | 0.41<br>(0.28)  | 0.23<br>(0.16)     |
| <i>N parties</i>                                      | 96                 | 100                     | 82              | 278                |
| <i>N elections/countries</i>                          | 19                 | 20                      | 16              | 20                 |

Notes: Coefficient from OLS-regressions with fixed effects at the election level; standard errors in parentheses; \*  $p < 0.05$ , \*\*  $p < 0.01$ , \*\*\*  $p < 0.001$ .

**Figure A8. Version of Figure 3 excluding candidates who thought they could not win from the computation of homogeneity and value infusion**

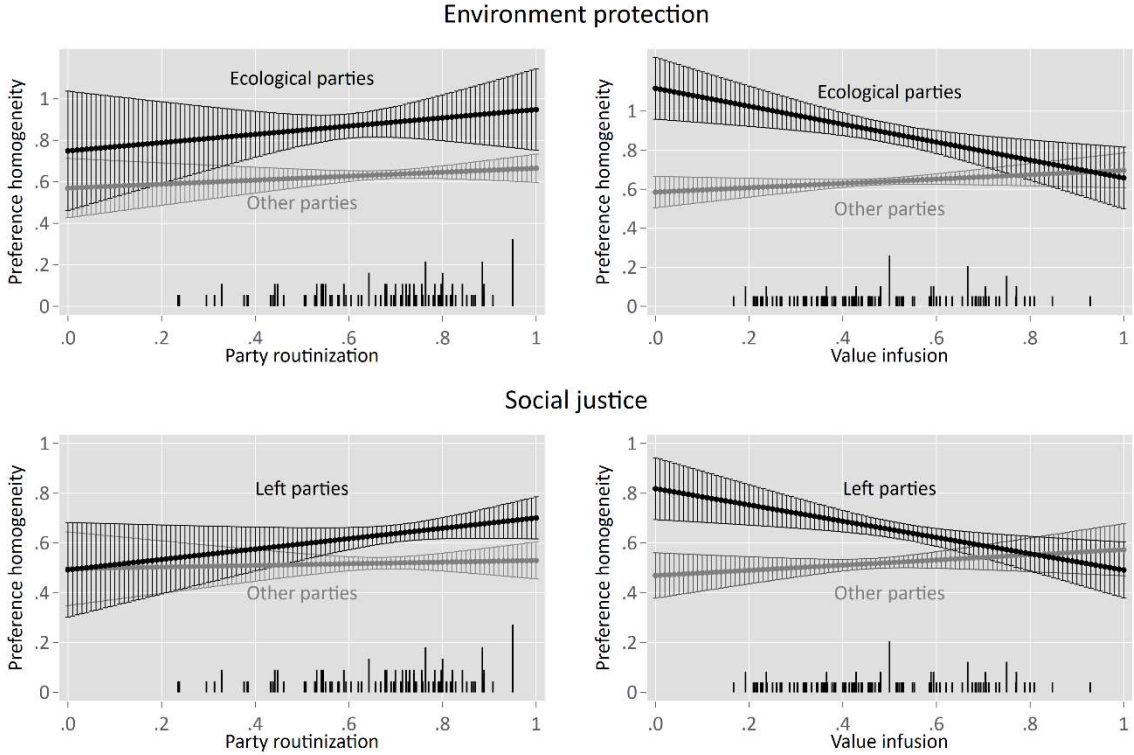

*Notes:* Predicted values for preference homogeneity with 83% confidence intervals. Non-overlapping 83% confidence intervals indicate that the predicted values are different with approximately  $p < 0.05$ . Histogram with observed variables for measures of institutionalization added.



**Figure A9. Version of Figure 4 excluding candidates who thought they could not win from the computation of homogeneity and value infusion**

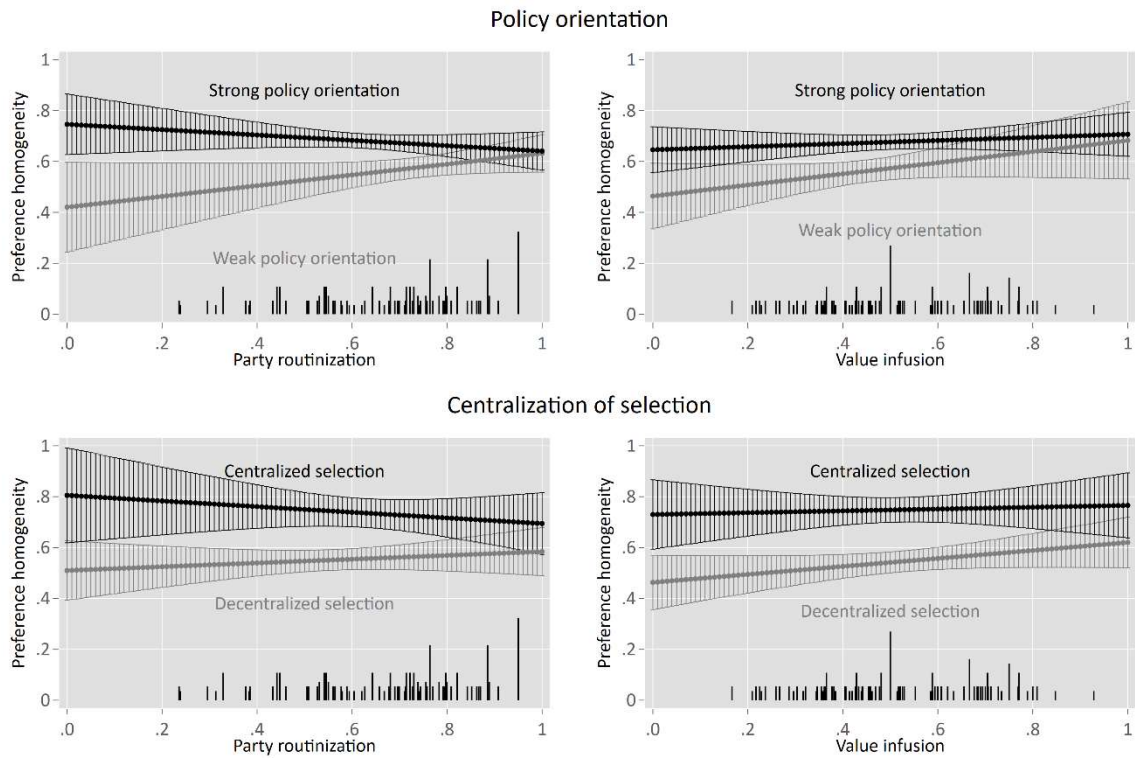

*Notes:* Predicted values for preference homogeneity with 83% confidence intervals. Non-overlapping 83% confidence intervals indicate that the predicted values are different with approximately  $p < 0.05$ . Histogram with observed variables for measures of institutionalization added. Prediction made for 5th and 95th percentile of the moderator variable.

**Table A8. Raw party level data (main variables only)**

| Election      | Party                        | N candidates | Routinization | Value infusion | Homogeneity |               |      |
|---------------|------------------------------|--------------|---------------|----------------|-------------|---------------|------|
|               |                              |              |               |                | Economic    | Sociocultural | EU   |
| Australia2007 | Australian Greens            | 117          | 0.24          | 0.40           | 0.60        | 0.58          |      |
| Australia2007 | Australian Labor Party (ALP) | 86           | 0.53          | 0.74           | 0.68        | 0.40          |      |
| Australia2007 | Liberal Party of Australia   | 66           | 0.53          | 0.57           | 0.53        | 0.62          |      |
| Australia2007 | National Party of Australia  | 12           | 0.39          | 0.10           | 0.70        | 0.40          |      |
| Austria2008   | BZOE                         | 75           | 0.31          | 0.25           |             | 0.63          | 0.32 |
| Austria2008   | FPOE                         | 155          | 0.64          | 0.30           |             | 0.74          | 0.34 |
| Austria2008   | Gruene                       | 215          | 0.60          | 0.21           |             | 0.76          | 0.56 |
| Austria2008   | KPOE                         | 63           |               | 0.28           |             | 0.76          | 0.38 |
| Austria2008   | OEVP                         | 220          | 0.89          | 0.41           |             | 0.68          | 0.55 |
| Austria2008   | SPOE                         | 170          | 0.89          | 0.47           |             | 0.74          | 0.53 |
| Belgium2007   | CD&V                         | 51           | 0.76          | 0.61           | 0.58        | 0.86          | 0.63 |
| Belgium2007   | CDH                          | 39           | 0.71          | 0.67           | 0.63        | 0.69          | 0.72 |
| Belgium2007   | ECOLO                        | 50           | 0.68          | 0.74           | 0.63        | 0.80          | 0.62 |
| Belgium2007   | GROEN!                       | 61           | 0.55          | 0.56           | 0.61        | 0.74          | 0.70 |
| Belgium2007   | LijstDedecker                | 41           | 0.30          | 0.32           | 0.37        | 0.68          | 0.36 |
| Belgium2007   | MR                           | 48           | 0.73          | 0.53           | 0.62        | 0.73          | 0.60 |
| Belgium2007   | N-VA                         | 15           | 0.44          | 0.50           | 0.61        | 0.96          | 0.50 |
| Belgium2007   | Open VLD                     | 52           | 0.72          | 0.55           | 0.52        | 0.76          | 0.68 |
| Belgium2007   | PS                           | 44           | 0.82          | 0.62           | 0.62        | 0.70          | 0.54 |
| Belgium2007   | sp.a/spirit                  | 47           | 0.76          | 0.74           | 0.51        | 0.72          | 0.67 |
| Belgium2007   | VlaamsBelang                 | 35           | 0.54          | 0.59           | 0.60        | 0.93          | 0.35 |
| Belgium2010   | CD&V                         | 67           | 0.76          | 0.75           | 0.52        | 0.62          | 0.64 |
| Belgium2010   | CDH                          | 39           | 0.71          | 0.42           | 0.53        | 0.66          | 0.52 |
| Belgium2010   | ECOLO                        | 59           | 0.68          | 0.78           | 0.62        | 0.78          | 0.64 |
| Belgium2010   | GROEN!                       | 70           | 0.55          | 0.66           | 0.62        | 0.63          | 0.65 |
| Belgium2010   | MR                           | 47           | 0.73          | 0.47           | 0.64        | 0.59          | 0.61 |
| Belgium2010   | NVA                          | 75           | 0.44          | 0.65           | 0.63        | 0.77          | 0.63 |
| Belgium2010   | PS                           | 44           | 0.82          | 0.74           | 0.76        | 0.69          | 0.71 |

|                   |                                  |     |      |      |      |      |      |
|-------------------|----------------------------------|-----|------|------|------|------|------|
| Belgium2010       | SPA                              | 54  | 0.76 | 0.70 | 0.61 | 0.68 | 0.66 |
| Belgium2010       | Vlaams Belang, VB                | 33  | 0.54 | 0.70 | 0.46 | 0.53 | 0.44 |
| Belgium2010       | VLD                              | 60  | 0.72 | 0.59 | 0.57 | 0.74 | 0.65 |
| CzechRepublic2006 | CSSD                             | 18  | 0.78 |      | 0.53 |      |      |
| CzechRepublic2006 | KDU                              | 70  | 0.83 |      | 0.56 |      |      |
| CzechRepublic2006 | KSCM                             | 18  | 0.80 |      | 0.57 |      |      |
| CzechRepublic2006 | ODS                              | 37  | 0.82 |      | 0.42 |      |      |
| CzechRepublic2006 | SZ                               | 24  | 0.44 |      | 0.32 |      |      |
| Denmark2011       | Conservative People's Party      | 36  | 0.51 | 0.54 | 0.48 | 0.67 | 0.02 |
| Denmark2011       | Danish People's Party            | 42  | 0.43 | 0.70 | 0.57 | 0.55 | 0.78 |
| Denmark2011       | Liberal Alliance                 | 36  | 0.24 | 0.50 | 0.41 | 0.56 | 0.32 |
| Denmark2011       | Liberals                         | 40  | 0.56 | 0.50 | 0.57 | 0.62 | 0.48 |
| Denmark2011       | Red/Green Alliance               | 59  | 0.38 | 0.69 | 0.48 | 0.85 | 0.52 |
| Denmark2011       | Social Democrats                 | 35  | 0.58 | 0.70 | 0.63 | 0.63 | 0.53 |
| Denmark2011       | Social Liberals                  | 35  | 0.45 | 0.59 | 0.55 | 0.81 | 0.47 |
| Denmark2011       | Socialist People's Party         | 46  | 0.45 | 0.62 | 0.57 | 0.67 | 0.29 |
| Finland2011       | Center Party of Finland          | 86  | 0.79 | 0.28 | 0.62 | 0.60 | 0.37 |
| Finland2011       | Christian Democrats in Finland   | 81  | 0.51 | 0.36 | 0.53 | 0.65 | 0.21 |
| Finland2011       | Green League                     | 88  | 0.56 | 0.34 | 0.69 | 0.63 | 0.60 |
| Finland2011       | National Coalition Party         | 63  | 0.74 | 0.41 | 0.49 | 0.46 | 0.71 |
| Finland2011       | Social democratic party          | 86  | 0.73 | 0.38 | 0.69 | 0.47 | 0.50 |
| Finland2011       | Swedish Peoples Party in Finland | 42  | 0.53 | 0.42 | 0.49 | 0.68 | 0.75 |
| Finland2011       | The Finns Party                  | 96  | 0.38 | 0.22 | 0.55 | 0.44 | 0.45 |
| Finland2011       | The Left Alliance                | 103 | 0.66 | 0.35 | 0.65 | 0.56 | 0.25 |
| Germany2005       | Bündnis90/Die Grünen             | 199 | 0.68 |      | 0.57 |      | 0.73 |
| Germany2005       | FDP                              | 203 | 0.70 |      | 0.46 |      | 0.46 |
| Germany2005       | Linke.PDS                        | 141 | 0.59 |      | 0.71 |      | 0.46 |
| Germany2005       | SPD                              | 182 | 0.84 |      | 0.60 |      | 0.75 |
| Germany2009       | Bündnis 90/Die Grünen            | 159 | 0.68 | 0.25 | 0.52 | 0.76 | 0.70 |
| Germany2009       | CDU/CSU                          | 176 |      | 0.28 | 0.48 | 0.46 | 0.57 |
| Germany2009       | Die Linke                        | 147 | 0.59 | 0.35 | 0.76 | 0.64 | 0.40 |
| Germany2009       | FDP                              | 149 | 0.70 | 0.28 | 0.45 | 0.43 | 0.53 |

|             |                                      |     |      |      |      |      |      |
|-------------|--------------------------------------|-----|------|------|------|------|------|
| Germany2009 | SPD                                  | 158 | 0.84 | 0.40 | 0.59 | 0.59 | 0.65 |
| Greece2007  | New Democracy (ND)                   | 95  | 0.95 | 0.63 | 0.57 | 0.64 | 0.53 |
| Greece2007  | PASOK                                | 146 | 0.95 | 0.43 | 0.62 | 0.63 | 0.58 |
| Greece2009  | ND                                   | 106 | 0.95 | 0.47 | 0.58 | 0.71 | 0.58 |
| Greece2009  | PASOK                                | 86  | 0.95 | 0.53 | 0.61 | 0.57 | 0.69 |
| Greece2012  | DIMAR                                | 87  |      | 0.56 | 0.67 | 0.71 | 0.68 |
| Greece2012  | ND                                   | 67  | 0.95 | 0.59 | 0.69 | 0.55 | 0.58 |
| Greece2012  | PASOK                                | 113 | 0.95 | 0.45 | 0.59 | 0.64 | 0.60 |
| Greece2012  | Syriza                               | 65  | 0.79 | 0.39 | 0.73 | 0.72 | 0.23 |
| Hungary2010 | Fidesz                               | 150 | 0.96 | 0.57 |      |      |      |
| Hungary2010 | Jobbik                               | 111 |      | 0.31 |      |      |      |
| Hungary2010 | LMP                                  | 70  |      | 0.24 |      |      |      |
| Hungary2010 | MSZP                                 | 53  | 0.97 | 0.63 |      |      |      |
| Iceland2009 | Civic Movement                       | 95  |      | 0.19 | 0.44 | 0.49 |      |
| Iceland2009 | Independence Party                   | 92  |      | 0.24 | 0.42 | 0.58 |      |
| Iceland2009 | Left Green Movement                  | 94  |      | 0.38 | 0.50 | 0.63 |      |
| Iceland2009 | Progressive Party                    | 85  |      | 0.35 | 0.44 | 0.63 |      |
| Iceland2009 | Social Democratic Alliance           | 97  |      | 0.34 | 0.58 | 0.55 |      |
| Ireland2007 | FF                                   | 42  | 0.87 | 0.79 | 0.60 | 0.51 | 0.70 |
| Ireland2007 | FG                                   | 38  | 0.85 | 0.63 | 0.48 | 0.74 | 0.70 |
| Ireland2007 | Greens                               | 20  | 0.38 | 0.71 | 0.76 | 0.65 | 0.71 |
| Ireland2007 | Labour                               | 30  | 0.53 | 0.68 | 0.76 | 0.51 | 0.75 |
| Ireland2007 | SF (Sinn Fein)                       | 12  | 0.69 | 0.82 | 0.85 | 0.56 | 0.28 |
| Italy2013   | CENTRO DEMOCRATICO                   | 36  |      | 0.32 | 0.62 | 0.62 | 0.55 |
| Italy2013   | FRATELLI D'ITALIA                    | 31  |      | 0.34 | 0.46 | 0.49 | 0.30 |
| Italy2013   | IL POPOLO DELLA LIBERTA'             | 73  |      | 0.40 | 0.45 | 0.54 | 0.34 |
| Italy2013   | LEGA NORD                            | 32  | 0.69 | 0.61 | 0.48 | 0.80 | 0.33 |
| Italy2013   | MOVIMENTO 5 STELLE BEPPEGRILLO.IT    | 135 |      | 0.39 | 0.63 | 0.59 | 0.42 |
| Italy2013   | PARTITO DEMOCRATICO                  | 145 | 0.87 | 0.60 | 0.69 | 0.59 | 0.80 |
| Italy2013   | RIVOLUZIONE CIVILE                   | 45  |      | 0.44 | 0.69 | 0.51 | 0.45 |
| Italy2013   | SCELTA CIVICA CON MONTI PER L'ITALIA | 69  |      | 0.33 | 0.33 | 0.43 | 0.58 |
| Italy2013   | SINISTRA ECOLOGIA LIBERTA'           | 67  |      | 0.39 | 0.77 | 0.74 | 0.73 |

|                 |                         |     |      |      |      |      |      |
|-----------------|-------------------------|-----|------|------|------|------|------|
| Italy2013       | UNIONE DI CENTRO        | 36  | 0.63 | 0.25 | 0.39 | 0.63 | 0.47 |
| Netherlands2006 | CDA                     | 32  | 0.76 | 0.84 | 0.71 | 0.61 | 0.62 |
| Netherlands2006 | D66                     | 18  | 0.57 | 0.59 | 0.63 | 0.50 | 0.64 |
| Netherlands2006 | Groen Links             | 12  | 0.60 | 0.55 | 0.73 | 0.95 | 0.51 |
| Netherlands2006 | Pvd Dieren              | 13  |      | 0.65 | 0.31 | 0.63 | 0.07 |
| Netherlands2006 | PvdA                    | 22  | 0.77 | 0.57 | 0.70 | 0.89 | 0.80 |
| Netherlands2006 | SGP                     | 13  |      | 0.82 | 0.67 | 1.00 | 0.43 |
| Netherlands2006 | SP                      | 25  | 0.71 | 0.83 | 0.82 | 0.81 | 0.50 |
| Netherlands2006 | VVD                     | 26  | 0.71 | 0.54 | 0.60 | 0.55 | 0.51 |
| Norway2009      | Ap                      | 150 | 0.74 | 0.86 | 0.56 | 0.62 |      |
| Norway2009      | FrP                     | 147 | 0.68 | 0.83 | 0.36 | 0.53 |      |
| Norway2009      | Høyre                   | 131 | 0.71 | 0.54 | 0.40 | 0.64 |      |
| Norway2009      | KrF                     | 140 | 0.62 | 0.63 | 0.55 | 0.55 |      |
| Norway2009      | Sp                      | 147 | 0.67 | 0.62 | 0.53 | 0.54 |      |
| Norway2009      | SV                      | 155 | 0.59 | 0.73 | 0.64 | 0.78 |      |
| Norway2009      | V                       | 136 | 0.58 | 0.53 | 0.54 | 0.60 |      |
| Portugal2009    | BE                      | 42  | 0.33 | 0.34 | 0.72 | 0.58 | 0.60 |
| Portugal2009    | CDS-PP                  | 56  | 0.55 | 0.42 | 0.52 | 0.56 | 0.63 |
| Portugal2009    | PS                      | 29  | 0.89 | 0.48 | 0.61 | 0.71 | 0.79 |
| Portugal2009    | PSD                     | 50  | 0.89 | 0.41 | 0.56 | 0.54 | 0.75 |
| Portugal2011    | BE                      | 52  | 0.33 | 0.30 | 0.66 | 0.61 | 0.46 |
| Portugal2011    | CDS-PP                  | 62  | 0.55 | 0.38 | 0.43 | 0.56 | 0.46 |
| Portugal2011    | PS                      | 45  | 0.89 | 0.34 | 0.75 | 0.71 | 0.66 |
| Portugal2011    | PSD                     | 56  | 0.89 | 0.45 | 0.70 | 0.53 | 0.68 |
| Romania2012     | ARD                     | 49  |      | 0.34 |      |      |      |
| Romania2012     | PPDD                    | 82  |      | 0.37 |      |      |      |
| Romania2012     | UDMR                    | 100 | 0.58 | 0.68 |      |      |      |
| Romania2012     | USL                     | 109 |      | 0.35 |      |      |      |
| Sweden2010      | The Center Party        | 229 | 0.86 | 0.52 | 0.50 | 0.61 | 0.43 |
| Sweden2010      | The Christian Democrats | 227 | 0.81 | 0.51 | 0.50 | 0.44 | 0.36 |
| Sweden2010      | The Conservatives       | 296 | 0.89 | 0.62 | 0.49 | 0.56 | 0.50 |
| Sweden2010      | The Green Party         | 236 | 0.76 | 0.41 | 0.62 | 0.62 | 0.17 |

|                 |                      |     |      |      |      |      |      |
|-----------------|----------------------|-----|------|------|------|------|------|
| Sweden2010      | The Left Party       | 228 | 0.79 | 0.57 | 0.67 | 0.69 | 0.42 |
| Sweden2010      | The Liberal Party    | 172 | 0.81 | 0.42 | 0.54 | 0.61 | 0.60 |
| Sweden2010      | The Social Democrats | 303 | 0.91 | 0.70 | 0.65 | 0.68 | 0.30 |
| Sweden2010      | The Sweden Democrats | 27  | 0.46 | 0.72 | 0.52 | 0.57 | 0.77 |
| Switzerland2007 | CSP/PCS              | 22  |      | 0.35 | 0.50 | 0.56 |      |
| Switzerland2007 | CVP/PDC              | 212 | 0.78 | 0.31 | 0.49 | 0.41 |      |
| Switzerland2007 | EDU/UDF              | 82  |      | 0.44 | 0.42 | 0.75 |      |
| Switzerland2007 | EVP/PEV              | 161 |      | 0.28 | 0.59 | 0.59 |      |
| Switzerland2007 | FDP/PRD              | 235 | 0.80 | 0.34 | 0.31 | 0.50 |      |
| Switzerland2007 | GLP                  | 27  |      | 0.46 | 0.47 | 0.54 |      |
| Switzerland2007 | GPS/PES              | 274 | 0.64 | 0.38 | 0.62 | 0.56 |      |
| Switzerland2007 | Pda/PST              | 26  |      | 0.52 | 0.70 | 0.59 |      |
| Switzerland2007 | SPS/PSS              | 280 | 0.74 | 0.47 | 0.66 | 0.59 |      |
| Switzerland2007 | SVP/UDC              | 215 | 0.76 | 0.44 | 0.36 | 0.52 |      |
| Switzerland2011 | BDP                  | 83  |      | 0.23 | 0.39 | 0.50 |      |
| Switzerland2011 | CSP/PCS              | 17  |      | 0.25 | 0.51 | 0.45 |      |
| Switzerland2011 | CVP/PDC              | 178 | 0.78 | 0.24 | 0.44 | 0.35 |      |
| Switzerland2011 | EVP/PEP              | 122 |      | 0.20 | 0.54 | 0.60 |      |
| Switzerland2011 | FDP/PRD              | 190 | 0.80 | 0.32 | 0.29 | 0.46 |      |
| Switzerland2011 | GLP/Vert'libéraux    | 121 |      | 0.26 | 0.43 | 0.57 |      |
| Switzerland2011 | GPS/PES              | 214 | 0.64 | 0.37 | 0.63 | 0.58 |      |
| Switzerland2011 | SP/PS                | 272 | 0.74 | 0.44 | 0.75 | 0.65 |      |
| Switzerland2011 | SVP/UDC              | 150 | 0.76 | 0.36 | 0.28 | 0.54 |      |
| UK2013          | Conservative Party   | 164 | 0.80 | 0.41 | 0.47 | 0.52 | 0.31 |
| UK2013          | Labour Party         | 242 | 0.80 | 0.47 | 0.64 | 0.66 | 0.48 |
| UK2013          | Liberal Democrats    | 319 | 0.70 | 0.32 | 0.57 | 0.58 | 0.60 |
